# Supplementary material for: Prevalence and perceptions of infant massage in India: study from Maharashtra and Madhya Pradesh states
Source: Springer Nature journal article supplement (doi:10.1186/s12887-020-02416-y), 2020-11-09
Supplement: MOESM2 [file 18568822]

17. What else do you apply to the baby: 1.  Powder 2.  Cream 3.  Shampoo  
 4.  Other than above, What if so.....  
 5.  Do not apply anything

18. Do you give massage to the baby: 1.  Yes, currently giving ;  
 Plan to continue giving massage till.....months/years  
 2.  Discontinued after.....  
 3.  No, did not give

**If NO, skip to Question 34.**

19. When after birth of the baby did you start giving massage?  days

20. Why did you start giving massage to the baby?  
 1.  Traditional practice 2.  Told by family elders/friends  
 3.  Told by doctor/nurse 4.  Told by dai/traditional care giver  
 5.  Other than above Specify here.....

21. Who gives the massage to your baby generally?  
 1. Parents:  Mother  Father  
 2. Relative:  Elderly  Not elderly Relation to baby:.....  
 3. Neighbour/acquaintance:  Female  Male  
 4. Dai:  Female  Male  
 5. Hired professional:  Profession- .....  
 6. Other than above:  Specify: .....

22. How often is massage given to your baby? .....times/ day or .....times / week

23. How long does a massage session last? .....minutes

24. When do you generally give massage- any relation to bath, feeding or sleep?

- | <b>Bath</b>                                                           | <b>Feeding</b>                                  | <b>Sleep</b>                                       |
|-----------------------------------------------------------------------|-------------------------------------------------|----------------------------------------------------|
| <input type="checkbox"/> Before bath                                  | <input type="checkbox"/> Before feeding         | <input type="checkbox"/> Before Sleep              |
| <input type="checkbox"/> After bath                                   | <input type="checkbox"/> After feeding          | <input type="checkbox"/> After waking up           |
| <input type="checkbox"/> Not related to bath                          | <input type="checkbox"/> Not related to feeding | <input type="checkbox"/> Not related to sleep time |
| <input type="checkbox"/> Specify any other time followed if any:..... |                                                 |                                                    |

25. What substance do you use mostly for massage?

1.  Oil : Specify ..... 2.  Ghee : Specify.....  
 3.  Butter: Specify:..... 4.  Powder: Specify:.....  
 5.  Lotion/cream : Specify:..... 6.  Other than above: Specify: .....

26. What are the reasons for this choice (of substance for massage)?
- |                                                         |                                                                  |
|---------------------------------------------------------|------------------------------------------------------------------|
| 1. <input type="checkbox"/> Own experience              | 2. <input type="checkbox"/> Recommended by family elders/friends |
| 3. <input type="checkbox"/> Recommended by doctor/nurse | 4. <input type="checkbox"/> Recommended by pharmacist            |
| 5. <input type="checkbox"/> By Traditional knowhow      | 6. <input type="checkbox"/> Other than above.....                |

27. Do you make any preparation for the massage substance (such as heating oil etc.)?  
 .....

28. Where do you get the massage substance from:
- |                                          |                                             |
|------------------------------------------|---------------------------------------------|
| 1. <input type="checkbox"/> Make at home | 2. <input type="checkbox"/> Buy from market |
|------------------------------------------|---------------------------------------------|

29. How much does the massage substance you use cost? Rs ...../month

30. Do you press at any specific areas of the baby's body during massage?
- |                                |                                 |                             |
|--------------------------------|---------------------------------|-----------------------------|
| 1. <input type="checkbox"/> No | 2. <input type="checkbox"/> Yes | If yes, which points: ..... |
|--------------------------------|---------------------------------|-----------------------------|

31. Do you stretch any body parts of the baby along with massage?
- |                                |                                 |                           |
|--------------------------------|---------------------------------|---------------------------|
| 1. <input type="checkbox"/> No | 2. <input type="checkbox"/> Yes | if yes, pl describe:..... |
|--------------------------------|---------------------------------|---------------------------|

32. What precautions do you take while giving massage?
- 1.....
  - 2.....
  - 3.....
  - 4.....

33. Are there any conditions when you avoid giving massage?
- 1.....
  - 2.....

34. Why did you not give massage to your baby?
- |                                                         |                                                                 |
|---------------------------------------------------------|-----------------------------------------------------------------|
| 1. <input type="checkbox"/> Advised so by doctor/nurse  | 2. <input type="checkbox"/> Advised so by family elders/friends |
| 3. <input type="checkbox"/> Own experience              | 4. <input type="checkbox"/> Lack of time                        |
| 5. <input type="checkbox"/> No skilled person available | 6. <input type="checkbox"/> Other than above:Specify here.....  |

35. What do you think are the benefits of massage, if any?
- 1.....
  - 2.....
  - 3.....
  - 4.....

36. What do you think could be the harm from massage, if any?
- 1.....
  - 2.....
  - 3.....
  - 4.....

37. Did you consult a doctor about any of the above baby care practices:

- 1. Massage    A.  No            B.  Yes            If yes, mention advise: .....
- 2. Instilling in fontanalle A.  No    B.  Yes    If yes, mention advise: .....
- 3. Instilling in eye            A.  No    B.  Yes    If yes, mention advise: .....
- 4. Instilling in ear            A.  No    B.  Yes    If yes, mention advise: .....
- 5. Instilling in nose            A.  No    B.  Yes    If yes, mention advise: .....

Name and address of facility where form is filled:

.....

Date of form filling:.....

Filled by: Name and Sign.....

Checked by: Name and Sign .....

Supervisor: Name and sign .....

Data entered by: .....
